# Supplementary material for: The Association between Postpartum Practice and Chinese Postpartum Depression: Identification of a Postpartum Depression-Related Dietary Pattern
Source: MDPI journal article supplement (doi:10.3390/nu14040903), 2022-02-21
Supplement: s1 [file s1]

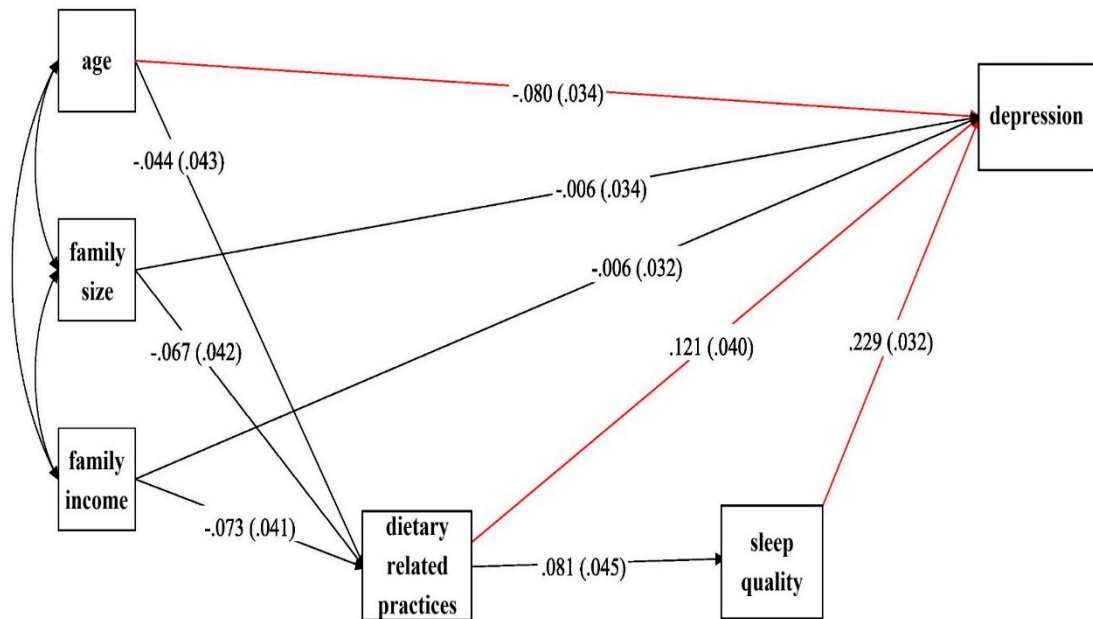

Supplementary Figure S1. The pathways among postpartum dietary practices and postpartum depression. The standardized effects (P values) are presented, and the red lines indicate the associations with significance.
